# Supplementary material
Source: PubMed Central journal article supplement (PMC10529525)
Supplement: NIHMS1919949-supplement-1.pdf [file NIHMS1919949-supplement-1.pdf]

# Supplementary Figure 1

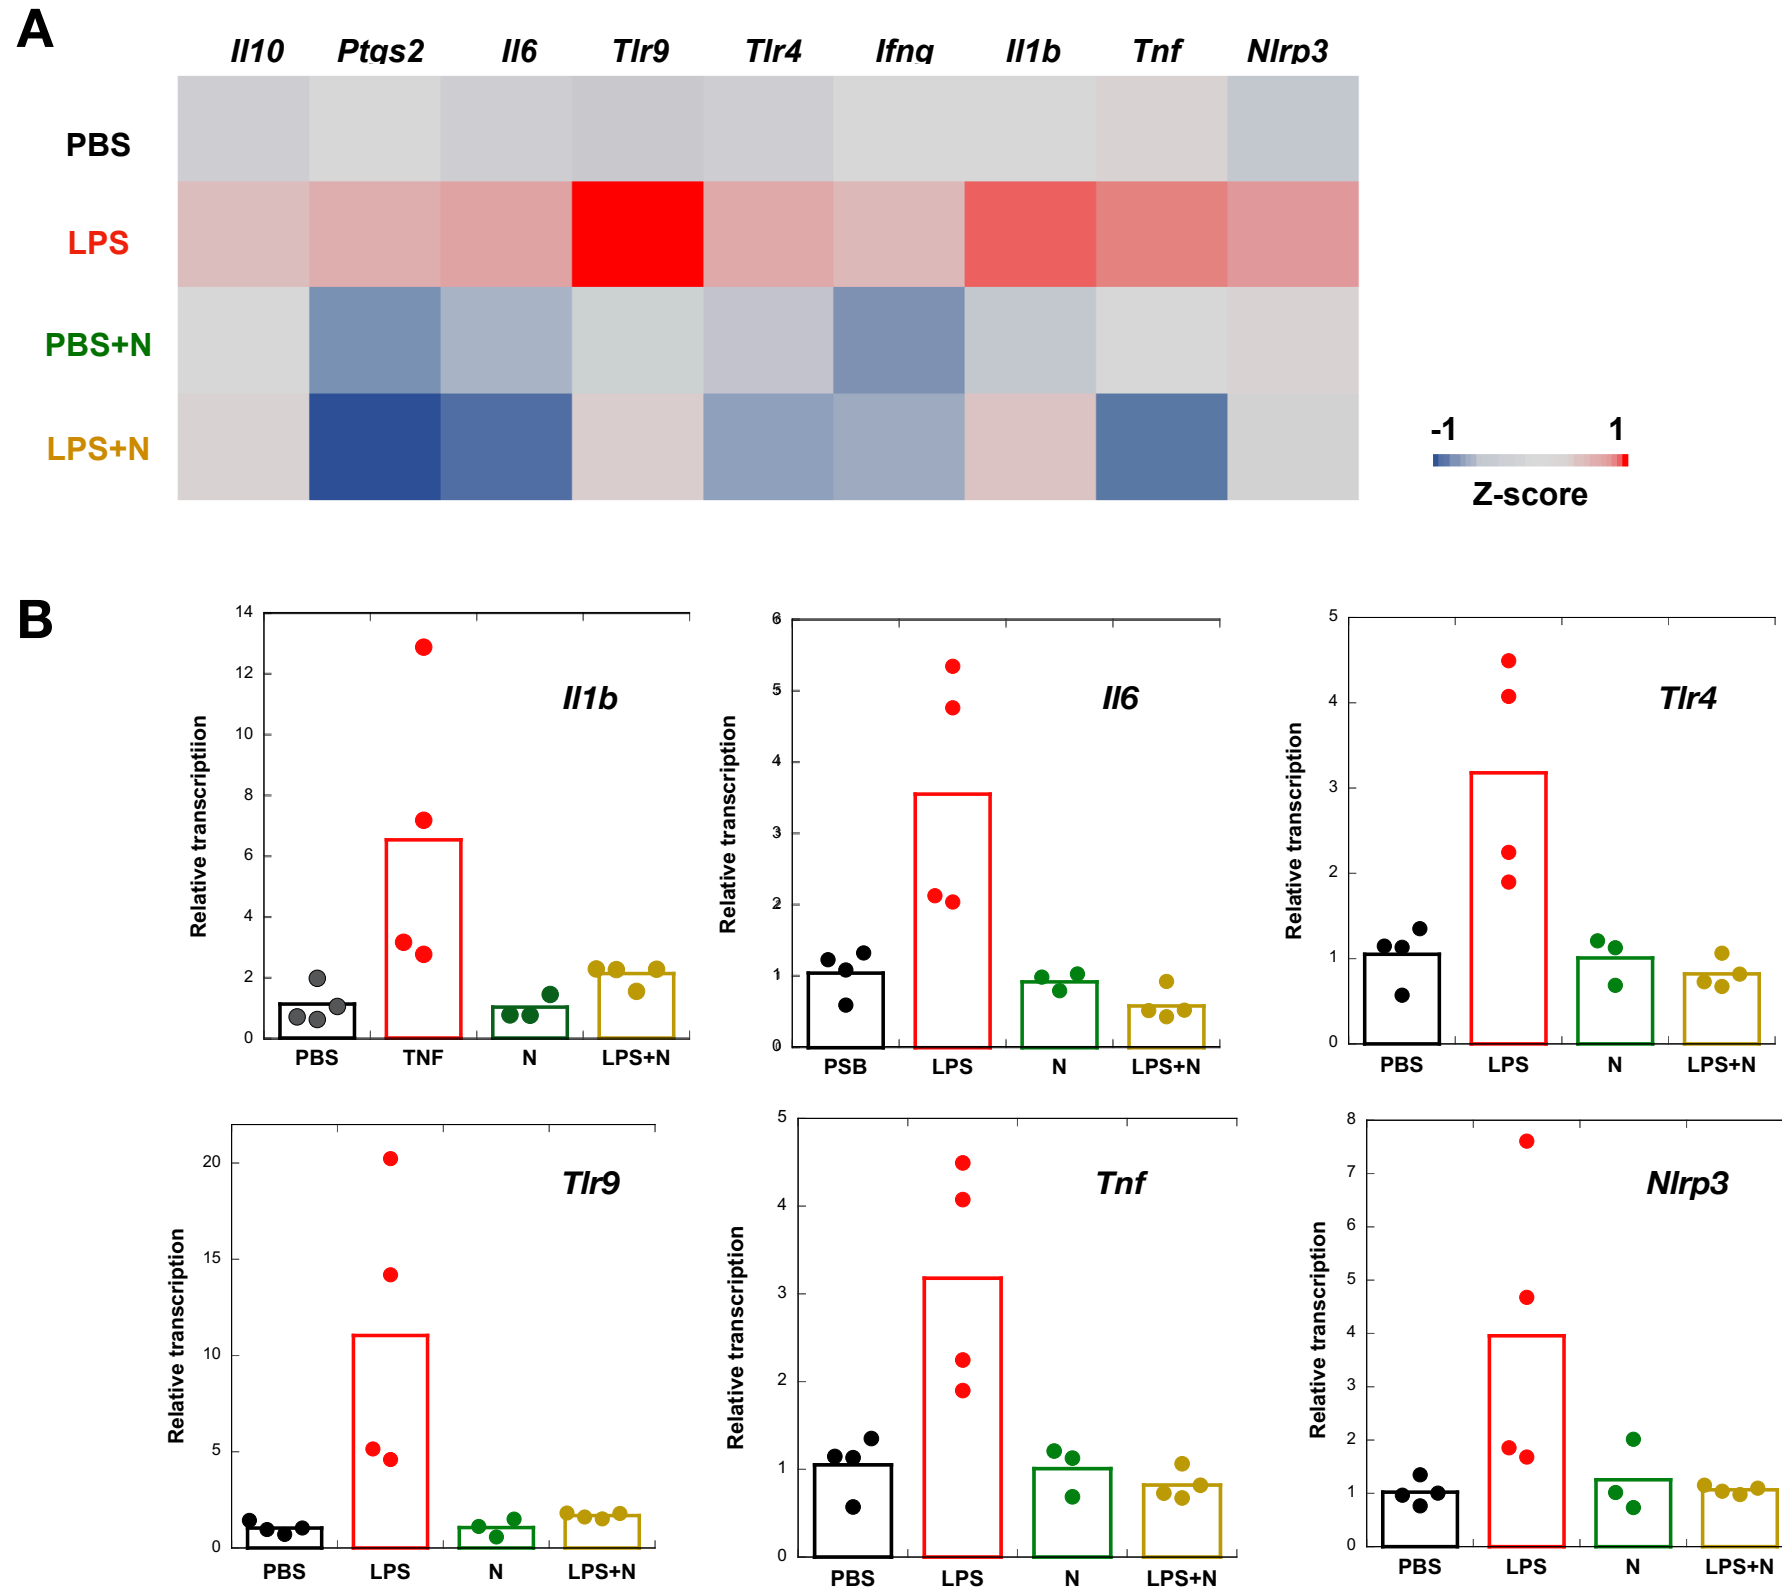

**Supplementary Figure 1. A:** Heatmap depicting the changes in transcript levels of various immune mediators in mouse decidual tissue (17.5 dpc) (n=4 animals for all except PBS+N, where n=3). **B:** Transcript levels of multiple immune mediators were measured using high throughput RT-qPCR in mouse decidual tissue (17.5 dpc) (n=4 animals for all except PBS+N, where n=3). For all graphs the LPS group is significantly higher than the rest ( $p < 0.05$ ).

# Supplementary Table 1

**Supplementary Table 1:** TaqMan assays utilized for RT-qPCR.

| <b>Name</b>                                               | <b>Symbol</b>   | <b>Assay ID</b> |
|-----------------------------------------------------------|-----------------|-----------------|
| Actin, beta                                               | <i>Actb</i>     | Mm04394036_g1   |
| Glucuronidase, beta                                       | <i>Gusb</i>     | Mm01197698_m1   |
| Glyceraldehyde-3-phosphate dehydrogenase                  | <i>Gapdh</i>    | Mm99999915_g1   |
| Heat shock protein 90 alpha (cytosolic), class B member 1 | <i>Hsp90ab1</i> | Mm00833431_g1   |
| Interleukin-1 beta                                        | <i>Il1b</i>     | Mm00434228_m1   |
| Interleukin-6                                             | <i>Il6</i>      | Mm00446190_m1   |
| Interleukin-10                                            | <i>Il10</i>     | Mm01288386_m1   |
| Interferon gamma                                          | <i>Ifng</i>     | Mm01168134_m1   |
| Toll-like receptor 4                                      | <i>Tlr4</i>     | Mm00445273_m1   |
| Toll-like receptor 9                                      | <i>Tlr9</i>     | Mm00446193_m1   |
| NLR family, pyrin domain containing 3                     | <i>Nlrp3</i>    | Mm00840904_m1   |
| Tumor necrosis factor                                     | <i>Tnf</i>      | Mm00443258_m1   |
| Prostaglandin-endoperoxide synthase 2                     | <i>Ptgs2</i>    | Mm00478374_m1   |
